# Supplementary material for: Dynamic contrast-enhanced photoacoustic imaging using photothermal stimuli-responsive composite nanomodulators
Source: PubMed Central journal article supplement (PMC5472754; doi:10.1038/ncomms15782), 2017-06-08
Supplement: ncomms15782-s1.pdf [file ncomms15782-s1.pdf]

1 **Supplementary figures**

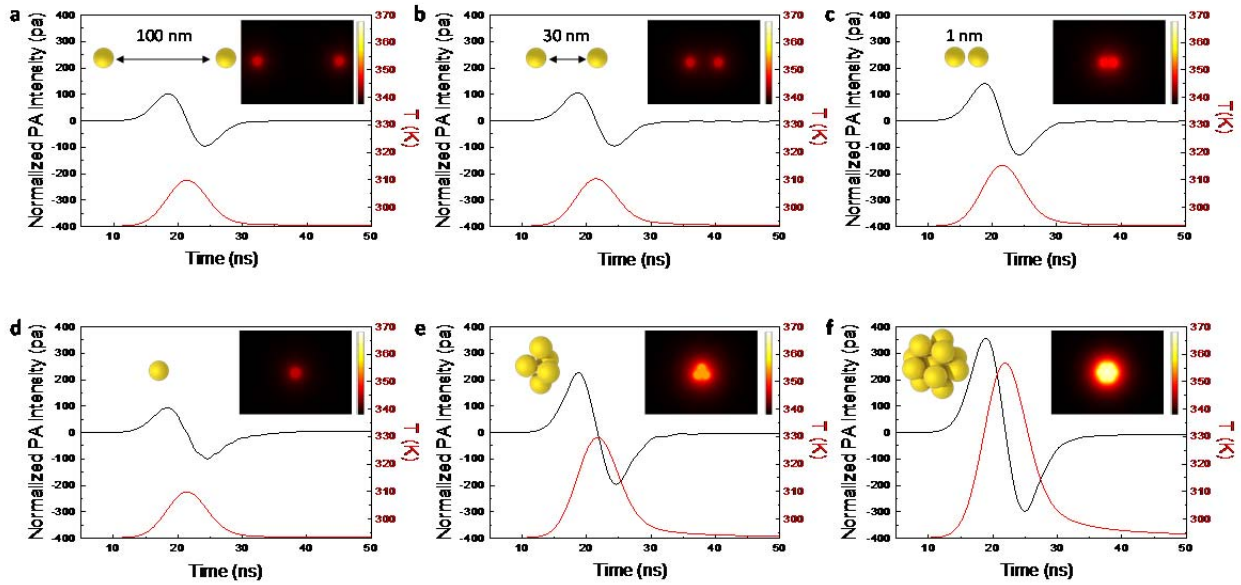

2

3 **Supplementary Figure 1| Numerical simulations of photoacoustic signal enhancement due to**  
4 **aggregation.** Photoacoustic intensities per particle and temperature rises as a function of time for gold  
5 nanospheres with distance varying from **a**, 100 nm, **b**, 30 nm and **c**, 1 nm. Photoacoustic intensities per  
6 particle and temperatures for clusters of gold nanospheres with **d**, 1, **e**, 5 and **f**, 13 particles. The particle  
7 particle distance for cluster simulations is kept at 1 nm. The insets show the two-dimensional temperature  
8 distribution at the peak temperature ( $t \sim 21.5$  nsec).

9

10

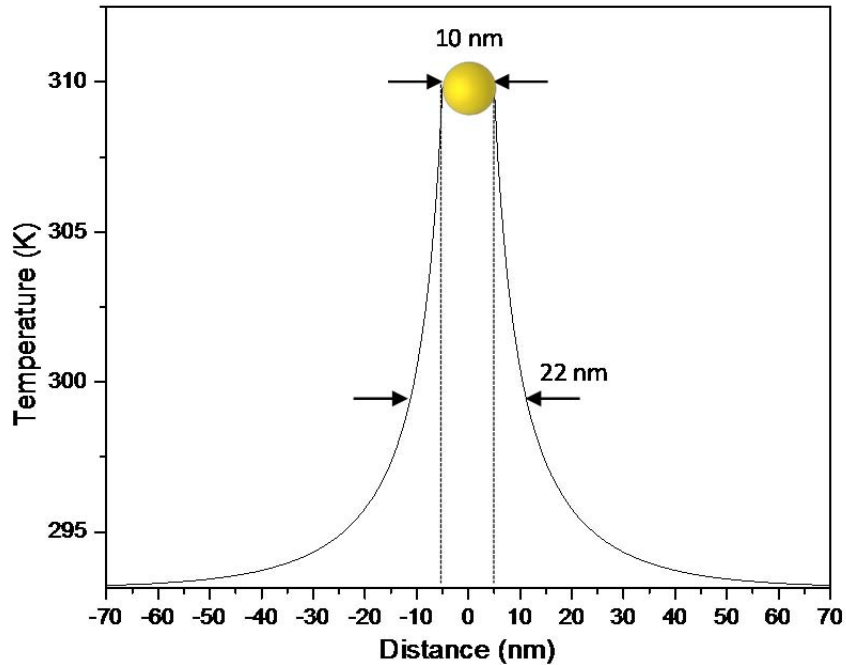

11

12 **Supplementary Figure 2| Numerical calculation of temperature profile as a function of space.** Heat  
 13 induced by laser irradiation dissipates out from 10 nm gold nanosphere to raise the temperature of its  
 14 surrounding water. The temperature decays quickly, and the decay length is characterized by the radius of  
 15 the thermal diffusion, a distance where the amplitude of the temperature falls to its 1/e from the surface of  
 16 the nanoparticle. In this case the thermal diffusion radius is 6 nm.

17

18

19

20

21

22

23

24

25

26

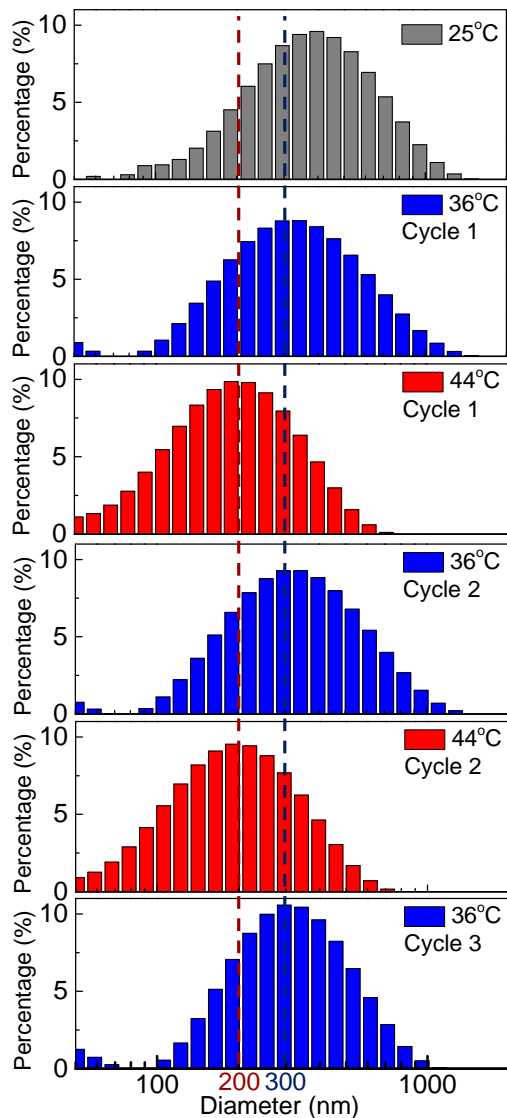

27

28 **Supplementary Figure 3| Dynamic light scattering (DLS) measurements of PNIPAM-AM-AuNRs**  
29 **nanoconstruct indicate its LCST is above 37 °C.** DLS measurements of PNIPAM-AM-AuNRs  
30 nanoconstruct at 25°C (grey), 37°C (blue), and 44°C (red). The results show that the size of the  
31 nanoconstructs slightly reduces from 350 nm at room temperature to 320 nm at 37°C. In multiple heating  
32 cycles, the size of the nanoconstructs can be repeatedly changed, following the modulation of temperature  
33 below and above LCST. The average size of nanoconstructs reduces from 320 nm at 37°C (below LCST)  
34 to 195 nm at 44°C (above LCST). The dotted lines indicate the mean values of the diameters of the  
35 nanoconstructs below and above LCST.

36

37

38

39

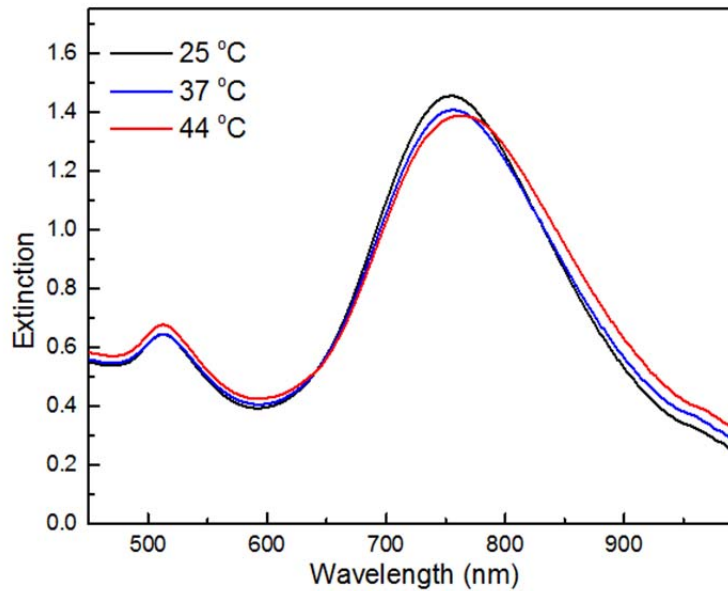

40 **Supplementary Figure 4| UV-Vis spectra of PNIPAM-AM-AuNR nanoconstructs** at 25°C (black  
41 curve), 37°C (blue curve), and 44°C (red curve) are recorded, featuring the temperature below and above  
42 the LCST of PNIPAM. Above the LCST temperature (>37 °C), the aggregation of PNIPAM-AM-AuNR  
43 nanoconstructs increases light scattering, resulting in the raise of spectrum at a shorter wavelength.  
44 Although the DLS measurements (Figure S3) indicate the size of the PNIPAM-AM-AuNRs is slightly  
45 reduced, no obvious aggregation is observed from UV-Vis spectrum.

46

47

48

49

50

51

52

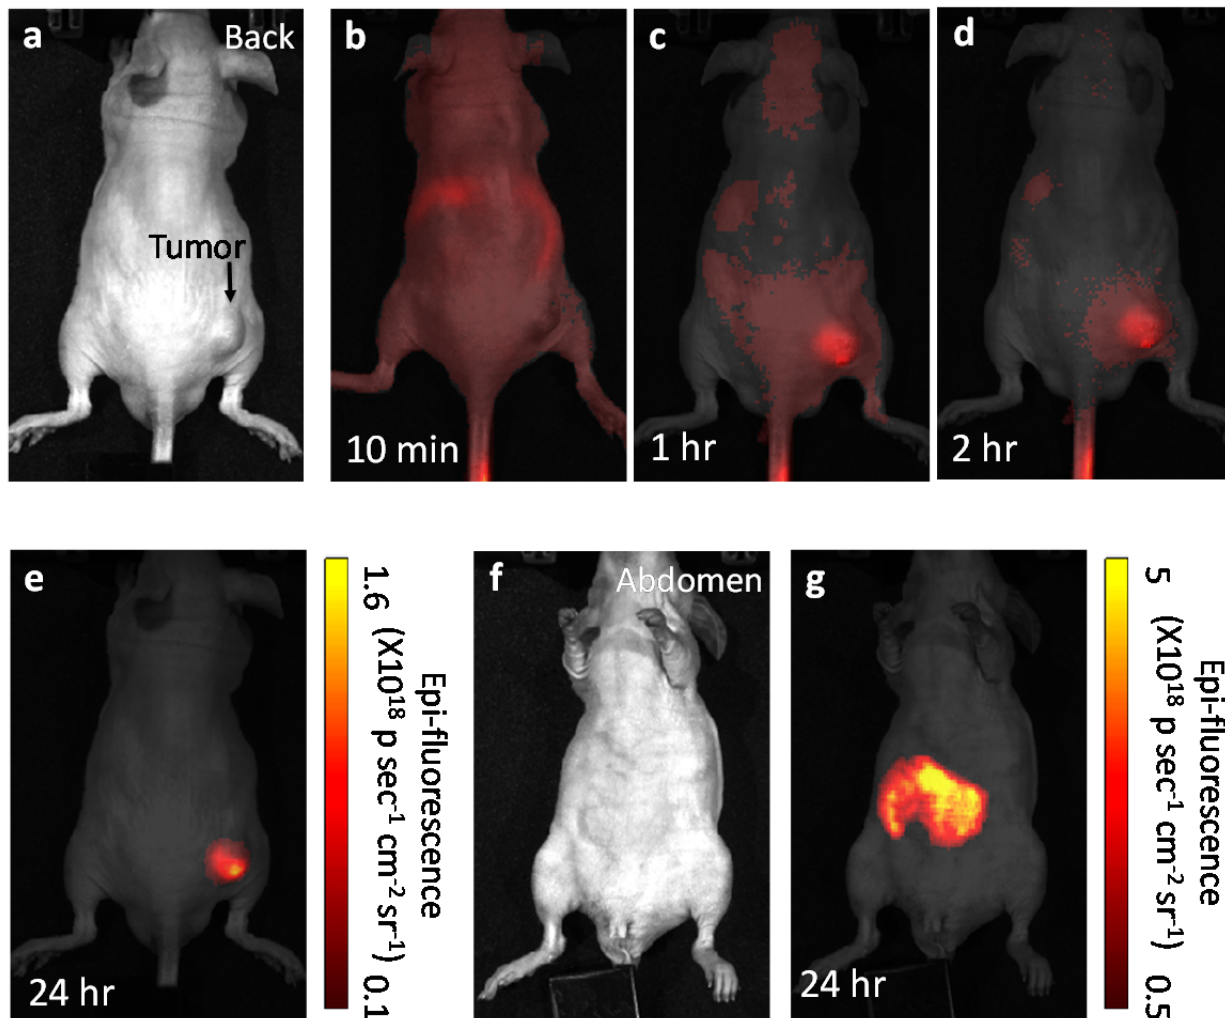

53

54 **Supplementary Figure 5| *In vivo* epi-fluorescent imaging.** **a.** Photographic image of the mouse from  
 55 the back, showing the tumor on the right rear leg. Fluorescent imaging of the mouse **b.** 10 minutes, **c.** one  
 56 hour, **d.** two hours, and **e.** 24 hours after tail vein injection of the nanoparticles. **e.** Abdomen photographic  
 57 image of the mouse. **g.** Epi-fluorescent image of the abdomen of the mouse, showing accumulation of the  
 58 nanoconstruct in the liver.

59

60

61

62

63

64

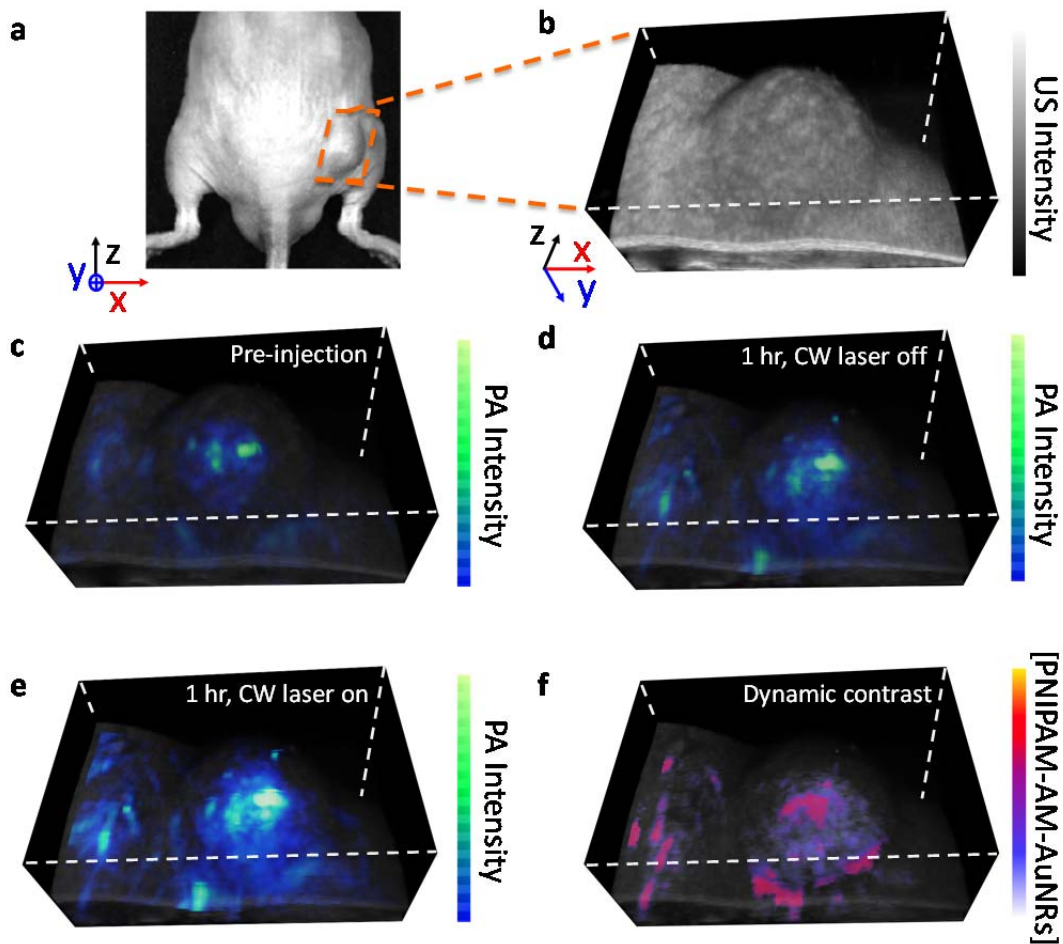

66

67 **Supplementary Figure 6| *In vivo* photoacoustic imaging of a tumor bearing mouse at 1 hour after**  
 68 **injection of nanoconstructs. a,** Photograph of a subcutaneous prostate tumor in the right thigh of a  
 69 mouse. **b,** Ultrasound image of the tumor for image co-registration. **c,** Photoacoustic image before  
 70 nanoparticle injection shows the tumor, and blood vessels near the tumor. **d,** After 1 hour of nanoparticle  
 71 injection, photoacoustic intensity of both tumor and blood vessels increases due to the high concentration  
 72 of the nanoconstruct residue in the blood. **e,** When the CW laser is on, the photoacoustic intensity is  
 73 further enhanced due to the de-swelling of the nanoconstructs. **f,** Dynamic contrast-enhanced  
 74 photoacoustic image obtained by subtracting the photoacoustic signals under CW laser-off from CW  
 75 laser-on, removing the photoacoustic signals from blood and revealing the region with only the PNIPAM-  
 76 AM-AuNRs. The image volume in **b-f** is 14.9 mm  $\times$  5.9 mm  $\times$  10.2 mm.

77

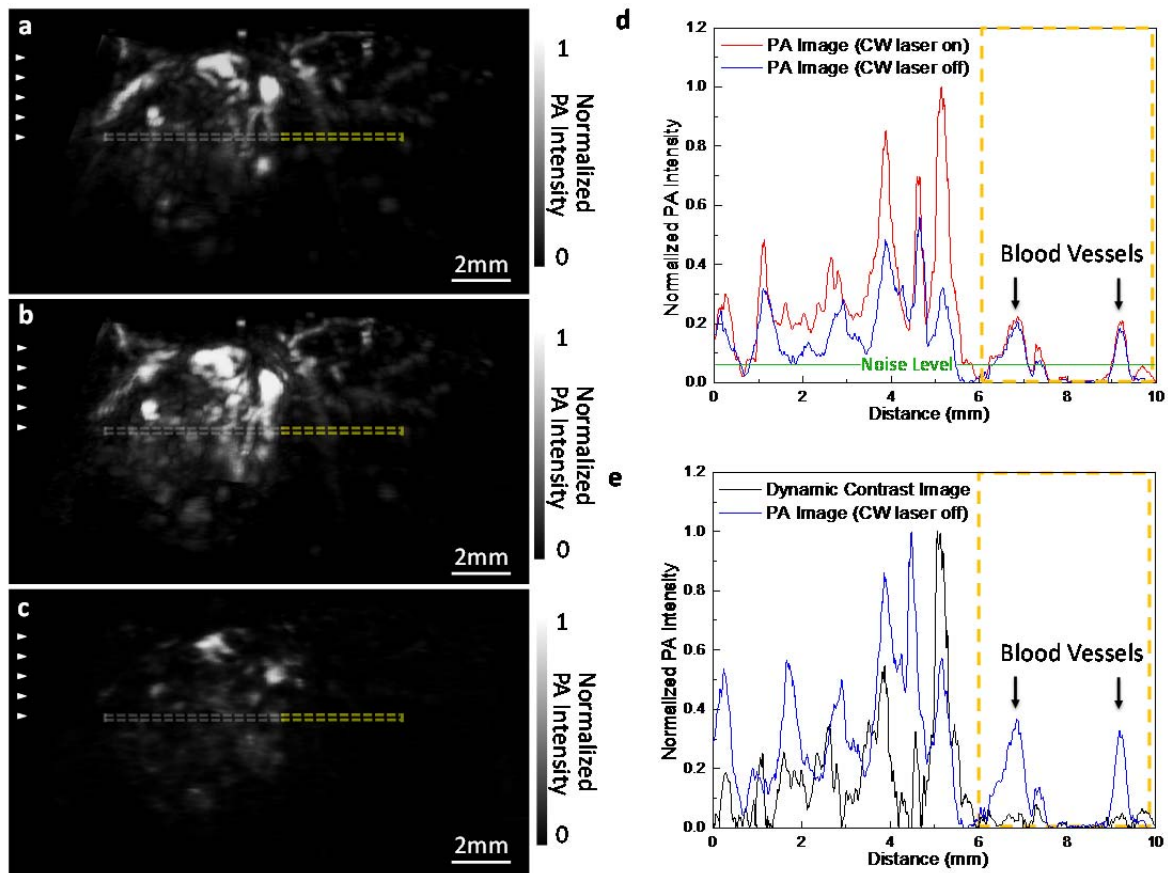

78

79 **Supplementary Figure 7| *In vivo* photoacoustic and dynamic contrast-enhanced imaging of the**  
 80 **mouse after 24 hours of injection.** Normalized photoacoustic imaging of the mouse tumor region with  
 81 PNIPAM-AM-AuNR nanoconstructs at 25°C with **a.** laser off and **b.** laser on. The photoacoustic intensity  
 82 in both image are normalized to maximum intensity of the image in panel (b). **c.** Dynamic contrast-  
 83 enhanced photoacoustic imaging by subtracting the photoacoustic images in panel (a) from panel (b). The  
 84 image is then rescaled to match the highest intensity of the image in panel (a). **d.** Averaged photoacoustic  
 85 intensity line profiles extracted from the 5 pixel locations, indicated by the dashed box in panels (a) and  
 86 (b), respectively. The green line indicates the electronic noise level of the imaging system. The dashed  
 87 yellow box indicates the region with blood vessels seen in Figure 5. **e.** Averaged line profiles of the  
 88 photoacoustic intensities extracted from the dynamic contrast-enhanced photoacoustic image in panel (c),  
 89 from the same locations where the line-profiles of the static photoacoustic images are extracted in panels  
 90 (a) and (b). The line profile from the laser off photoacoustic images is reproduced from panel (d),  
 91 renormalized to reveal the lower noise level from the blood vessels in the dynamic contrast-enhanced  
 92 imaging.

93

94

95

## 96 **Supplementary Note 1. Numerical Simulations**

97 Numerical simulations of PA intensities and temperature profiles as a function of time are  
98 conducted for gold nanospheres using commercially available software based on finite element  
99 method (COMSOL). The simulation incorporates a heat transfer model to calibrate temperature  
100 rise and a partial differential equation math model to calibrate the photoacoustic intensities. The  
101 photoacoustic intensity is recorded at a fixed point that is 300 nm away from the center of the  
102 nanosphere or clusters. The absorption cross-section of gold spheres is assumed to be  $6 \times 10^{-17}$   
103  $\text{m}^2$  in the calculation based on Ref. 1. All nanospheres have a diameter of 10 nm, and their  
104 frequency-dependent permittivity is obtained from Ref. 2. Temporal profile of the laser pulse is  
105 assumed to be Gaussian with a full width half maximum of 7 nanoseconds.

106 The two dominant parameters important in describing random distribution of the particle  
107 aggregation are: 1) the average distance between particles, and 2) the number of particles  
108 aggregated in a fixed separation. We start from the first case by considering the simplest  
109 aggregation—two gold nanospheres. Our UV-vis spectroscopy measurement indicates that the  
110 nanoparticle aggregation affects optical absorption negligibly. Therefore, to focus on  
111 thermodynamic effect, we assume that optical properties of each gold sphere do not change as  
112 they are brought together. Here in our simulation, we use gold nanospheres with an optical  
113 absorption cross-section of  $6 \times 10^{-17} \text{ m}^2$ .<sup>1</sup> **Supplementary Figure 1** shows that the photoacoustic  
114 intensity increases by 52% when the distance between two particles is reduced from 100 nm  
115 (**Supplementary Figure 1a**) to 1 nm (**Supplementary Figure 1c**). At the same time, this  
116 aggregation also affects temperature elevation within this nano-system by 1.8%.

117 Heat diffuses from the surface of the nanoparticles and decays exponentially, where the decay



118 length is characterized by the radius of the thermal diffusion, a distance at which the temperature  
119 falls to its 1/e from nanoparticle surface (~6 nm in this case, **Supplementary Figure 2**). When  
120 the two nanoparticles are more than 12 nm apart, the enhancement effect becomes negligible  
121 (**Supplementary Figure 1a, b**). Although the total energy absorbed by particles is the same in  
122 our calculation, a smaller particle separation increases the temperature in the gap and causes the  
123 photoacoustic signals to increase, because the photoacoustic signal intensity is directly related to  
124 the thermal flux.

125 In addition to the effect caused by the separation distance, we also investigate effect caused by  
126 the number of particle aggregation in a single cluster. When the nanosphere density is increased  
127 from 1 to 5, and to 13 with a fixed particle separation of 1 nm (**Supplementary Figure 1d-f**),  
128 both temperature and photoacoustic intensity are boosted dramatically: temperature is increased  
129 by 15.2% for 13 particles, whereas photoacoustic intensity per particle is increased by 285%.  
130 The increased numbers of nanoparticles more efficiently accumulate the heat within their gaps;  
131 because the photoacoustic signal intensity is directly related to the rate of temperature variation,  
132 the aggregation creates temperature “hotspots”, resulting in a higher photoacoustic intensity.  
133 This indicates that if a nanoparticle cluster aggregation can be controlled by external stimuli, it  
134 will be an effective photoacoustic stimuli-responsive contrast agent.

### 135 **Supplementary References**

- 136 1. Liu, X., Atwater, M., Wang, J. & Huo, Q. Extinction coefficient of gold nanoparticles with different  
137 sizes and different capping ligands. *Colloids Surf., B* **58**, 3-7, (2007).
- 138 2. Johnson, P. B. & Christy, R. W. Optical constants of noble metals. *Phys. Rev. B* **6**, 4370-4379, (1972).
